# Supplementary material for: Rebound Effects of Exchange Rate and Central Bank Interventions in Selected ECOWAS Countries
Source: Preprints.org preprint supplement (doi:10.20944/preprints201702.0034.v1), 2017-02-10
Supplement: Supplementary file 1 [file supplementary]

## Sheet: Sheet1
Indicator Name	BIRTH	EPRY	GDPPC	GDPCG	GEXP	GFCF	GFCFC	INFL	LABOR	ECONFR	POLFRE	POLSTA	GFCF_IMF	CPS	Total Expenditure	Recurrent Expenditure1	Capital Expenditure2	EXPT	IMPT
1960	46.26		1297.83					5.44433	0.249335		8	0	10.8333					9.24153	16.925
1961	46.206		1274.04	-1.83301				6.27915	0.249335		8	1	10.9244					9.18513	16.2999
1962	46.128		1298.9	1.95167				5.26563	0.249335		8	2	12.3016					8.26914	13.5604
1963	46.031		1380.72	6.29869				-2.69466	0.249335		8	3	13.2203					8.77917	13.5373
1964	45.927		1418.38	2.72776				0.856793	0.249335		7	0	15.873					9.20213	15.4132
1965	45.839		1456.02	2.65371				4.10346	0.249335		7	0	18.4524					10.8934	16.0173
1966	45.792		1364.32	-6.29808				9.69035	0.249335		-7	0	16.6205					10.4138	14.6225
1967	45.803		1124.72	-17.5618				-3.72634	0.249335		-7	1	16.2712					11.0773	17.4111
1968	45.878		1086.41	-3.40591				-0.476059	0.249335		-7	2	15.2778					9.92732	15.7362
1969	46.014		1319.32	21.4384				10.156	0.249335		-7	3	11.6034					11.3911	15.4301
1970	46.2	3515827	1611.86	22.173				13.7571	0.249335	4.31	-7	4	9.82143					8.40707	11.2135
1971	46.418	3894539	1798.98	11.6092				15.9991	0.249335		-7	5	12.3314					10.8343	13.6294
1972	46.638	4391197	1816.02	0.947332				3.45765	0.249335		-7	6	12.6927					10.9681	11.7955
1973	46.835	4662400	1867.73	2.84711				5.40266	0.249335		-7	7	20.4898					15.9179	15.3498
1974	46.991		2023.43	8.33647	3.21017			12.6744	0.249335		-7	8	15.102					25.1785	14.5685
1975	47.093		1866.1	-7.77512	3.06369			33.9642	0.249335	3.88	-7	9	21.8736					18.3388	22.8316
1976	47.134	4889857	1976.95	5.94013				24.3	0.249335		-7	10	28.3467					18.2158	23.9223
1977	47.12	6165547	2033.92	2.88161	2.34325			15.0878	0.249335		-7	11	28.0441					24.8724	22.5229
1978	47.057	8100324	1859.14	-8.59317	1.6491			21.7092	0.249335		-88	0	26.0472					19.5526	23.7622
1979	46.948	9867961	1926.42	3.61865	2.14915			11.7097	0.249335		7	0	21.2072					24.8161	19.0623
1980	46.793	10798550	1950.8	1.26542	3.12256			9.97226	0.249335	3.46	7	1	21.8421					29.3752	19.1961
1981	46.593	12117483	1649.24	-15.4583	2.06763	35.2213	5.86976e+10	20.8128	0.249335		7	2	27.9714	9.08566	11.4137	4.8467	6.567	22.1875	26.1058
1982	46.356	13760030	1589.87	-3.5994	2.31244	31.9533	4.55212e+10	7.69775	0.269985		7	3	22.152	10.5615	11.9232	5.506	6.4172	17.8338	19.9147
1983	46.092	14311608	1471.72	-7.43166	1.82159	23.0065	2.98522e+10	23.2123	0.284965		7	4	16.8142	10.6011	9.6365	4.7508	4.8857	14.5362	12.501
1984	45.809	14654798	1405.89	-4.47282	1.44442	14.224	1.91064e+10	17.8205	0.308704		-7	0	11.0366	10.7188	9.9276	5.8275	4.1001	15.7054	7.90345
1985	45.516	14383487	1484.31	5.57756	1.25198	11.9652	1.80364e+10	7.43534	0.310911	4.19	-7	1	8.86467	9.71155	13.0411	7.5764	5.4647	17.3852	8.51486
1986	45.218	13025287	1319.51	-11.1026	1.58329	15.1538	1.56578e+10	5.71715	0.307774		-7	2	10.5857	11.3277	16.2237	7.6969	8.5268	13.316	10.4007
1987	44.92	12914870	1147.07	-13.0683	0.621063	13.6075	1.19667e+10	11.2903	0.308589		-7	3	10.1312	10.9167	22.0187	15.6462	6.3725	26.9419	14.7048
1988	44.63	12690798	1201.51	4.74573	0.77945	11.8711	1.25002e+10	54.5112	0.345737		-7	4	8.90071	10.3787	27.7495	19.4094	8.3401	22.8546	12.4574
1989	44.354	12721087	1246.18	3.71793	0.895675	11.7423	1.27501e+10	50.4667	0.296721		-5	5	8.4917	7.95351	41.0283	25.9942	15.0341	43.9813	16.4104
1990	44.101	13607249	1369.44	9.89125	0.857522	14.2501	1.7678e+10	7.3644	0.291782	3.52	-5	6	11.4483	7.09781	60.2682	36.2196	24.0486	35.3442	17.686
1991	43.879	13776854	1326.74	-3.11857	0.497918	13.7327	1.76107e+10	13.007	0.294422		-5	7	11.3475	7.57826	66.5844	38.2435	28.3409	41.7011	23.1755
1992	43.686	14805937	1299.28	-2.06934	0.386847	12.7482	1.70833e+10	44.5888	0.276793		-5	8	11.0099	6.64002	92.7974	53.0341	39.7633	37.5094	23.5216
1993	43.521	15870280	1293.62	-0.436155	1.16968	13.55	1.98158e+10	57.1653	0.317834		-7	9	11.837	11.6656	191.229	136.727	54.5018	33.8299	24.28
1994	43.384	16190947	1273.19	-1.57879	1.14282	11.1654	1.78027e+10	57.0317	0.335023		-7	10	9.44814	10.2468	160.893	89.9749	70.9183	24.3102	17.9986
1995	43.275	15741078	1238	-2.76403	0.658422	7.06576	1.31393e+10	72.8355	0.315048	3.81	-6	11	5.92176	6.19135	248.768	127.63	121.138	35.7615	24.0063
1996	43.192	14078473	1267.79	2.40597	0.568013	7.28992	1.55168e+10	29.2683	0.313739		-6	12	6.36803	5.91713	337.218	124.491	212.926	32.2386	25.4524
1997	43.129		1271.18	0.267352	0.569028	8.35676	1.68884e+10	8.52987	0.327912		-6	13	7.33591	7.54806	428.215	158.564	269.652	41.7746	35.0854
1998	43.076		1273.45	0.179287	0.986597	8.60161	1.60343e+10	9.99638	0.329588		-88	0	7.12553	8.82217	487.113	178.098	309.016	29.6915	36.4817
1999	43.024	17907008	1247.83	-2.01237	0.988217	6.99411	1.55651e+10	6.61837	0.303981		4	0	5.52002	9.21455	947.69	449.662	498.028	33.8695	21.9769
2000	42.965	19151442	1281.56	2.70351	1.4746	7.01788	1.82162e+10	6.93329	0.254564	5.3	4	1	5.86867	7.90001	701.059	461.6	239.451	51.7304	19.6502
2001	42.889	19041224	1304.77	1.81087	1.26441	7.57987	1.42619e+10	18.8736	0.310654	5.2	4	2	7.87583	11.0941	1018.03	579.3	438.697	45.4481	36.3648
2002	42.791	19806082	1320.3	1.18988	1.58347	7.00992	1.71628e+10	12.8766	0.421539	5.71	4	3	7.22877	11.9359	1018.16	696.8	321.378	35.9657	27.4179
2003	42.666		1420.35	7.57813	0.93597	9.90405	2.57681e+10	14.0318	0.37784	5.6	4	4	10.2024	11.061	1225.97	984.3	241.688	39.7879	35.431
2004	42.512	21395510	1851.32	30.3422	0.821728	7.39337	1.95825e+10	14.998	0.371943	5.63	4	5	12.1069	12.4586	1426.2	1032.7	351.3	30.1608	18.2874
2005	42.329	22115432	1866.01	0.793569	0.823727	5.459	1.75344e+10	17.8635	0.308732	5.98	4	6	5.459	12.5823	1822.1	1223.7	519.5	31.657	19.0914
2006	42.123	22861884	1967	5.41225	0.88994	8.26586	2.79476e+10	8.23953	0.329671	6.55	4	7	8.26586	12.3386	1938	1290.2	552.386	43.1113	21.498
2007	41.9	21513996	2046.56	4.04467	0.899302	9.24964	3.96099e+10	5.38222	0.299674	6.34	4	8	9.24964	17.8149	2450.9	1589.27	759.323	33.7285	30.7344
2008	41.663	20008142	2117.84	3.4832		8.32348	3.93224e+10	11.578	0.286428	6.04	4	9	8.32348	28.5697	3240.82	2117.36	960.89	39.8831	25.0898
2009	41.408	20957642	2205	4.11549		12.0882	5.29943e+10	11.5377	0.306835	5.9	4	10	12.0882	36.8933	3452.99	2127.97	1152.8	30.7686	31.0342
2010	41.129	21558460	2314.96	4.98683		16.5552	6.1099e+10	13.7202	0.506764	6.17	4	11	16.5552	18.5984	4194.58	3109.38	883.875	25.2641	17.3873
2011	40.811		2363.67	2.10403		15.5339	5.60604e+10	10.8408	0.496142	6.39	4	12	15.5339	16.926	4712.06	3314.51	918.549	31.3298	21.4643
2012	40.45		2399.33	1.50883		14.1625	5.74909e+10	12.217	0.49927	6.28	4	13	14.1625	20.4274	4605.39	3325.16	874.834	31.4387	12.9414
2013	40.045		2461.8	2.60361		14.1687	6.20124e+10	8.47583	0.488774	6.45	4	14	14.1687	19.667	5185.32	3689.06	1108.39	18.0499	12.999
2014	39.6		2548.43	3.51865		15.0812	7.03301e+10	8.05738	0.488774	6.45	4	15	15.0812	19.2374	4587.39	3426.9	783.122	18.4351	12.4501
2015	39.13		2548.17	-0.00992406		14.8272		9.01768	0.495945		7	0	14.8272	19.8355	4988.86	3831.95	818.365

## Sheet: Data1981
	BIRTH	GDPPC	GDPCG	INFL	LABOR	POLFRE	POLSTA	GFCF_IMF	EXPT	IMPT	TO	CPS	GEXP
1981	46.593	1649.24	-15.4583	20.8128	0.249335	7	2	27.9714	22.1875	26.1058	48.2933	9.08566	2.06763
1982	46.356	1589.87	-3.5994	7.69775	0.269985	7	3	22.152	17.8338	19.9147	37.7485	10.5615	2.31244
1983	46.092	1471.72	-7.43166	23.2123	0.284965	7	4	16.8142	14.5362	12.501	27.0372	10.6011	1.82159
1984	45.809	1405.89	-4.47282	17.8205	0.308704	-7	0	11.0366	15.7054	7.90345	23.6089	10.7188	1.44442
1985	45.516	1484.31	5.57756	7.43534	0.310911	-7	1	8.86467	17.3852	8.51486	25.9001	9.71155	1.25198
1986	45.218	1319.51	-11.1026	5.71715	0.307774	-7	2	10.5857	13.316	10.4007	23.7168	11.3277	1.58329
1987	44.92	1147.07	-13.0683	11.2903	0.308589	-7	3	10.1312	26.9419	14.7048	41.6467	10.9167	0.621063
1988	44.63	1201.51	4.74573	54.5112	0.345737	-7	4	8.90071	22.8546	12.4574	35.312	10.3787	0.77945
1989	44.354	1246.18	3.71793	50.4667	0.296721	-5	5	8.4917	43.9813	16.4104	60.3918	7.95351	0.895675
1990	44.101	1369.44	9.89125	7.3644	0.291782	-5	6	11.4483	35.3442	17.686	53.0302	7.09781	0.857522
1991	43.879	1326.74	-3.11857	13.007	0.294422	-5	7	11.3475	41.7011	23.1755	64.8766	7.57826	0.497918
1992	43.686	1299.28	-2.06934	44.5888	0.276793	-5	8	11.0099	37.5094	23.5216	61.031	6.64002	0.386847
1993	43.521	1293.62	-0.436155	57.1653	0.317834	-7	9	11.837	33.8299	24.28	58.1098	11.6656	1.16968
1994	43.384	1273.19	-1.57879	57.0317	0.335023	-7	10	9.44814	24.3102	17.9986	42.3089	10.2468	1.14282
1995	43.275	1238	-2.76403	72.8355	0.315048	-6	11	5.92176	35.7615	24.0063	59.7678	6.19135	0.658422
1996	43.192	1267.79	2.40597	29.2683	0.313739	-6	12	6.36803	32.2386	25.4524	57.691	5.91713	0.568013
1997	43.129	1271.18	0.267352	8.52987	0.327912	-6	13	7.33591	41.7746	35.0854	76.86	7.54806	0.569028
1998	43.076	1273.45	0.179287	9.99638	0.329588	-88	0	7.12553	29.6915	36.4817	66.1732	8.82217	0.986597
1999	43.024	1247.83	-2.01237	6.61837	0.303981	4	0	5.52002	33.8695	21.9769	55.8464	9.21455	0.988217
2000	42.965	1281.56	2.70351	6.93329	0.254564	4	1	5.86867	51.7304	19.6502	71.3805	7.90001	1.4746
2001	42.889	1304.77	1.81087	18.8736	0.310654	4	2	7.87583	45.4481	36.3648	81.8128	11.0941	1.26441
2002	42.791	1320.3	1.18988	12.8766	0.421539	4	3	7.22877	35.9657	27.4179	63.3836	11.9359	1.58347
2003	42.666	1420.35	7.57813	14.0318	0.37784	4	4	10.2024	39.7879	35.431	75.2189	11.061	0.93597
2004	42.512	1851.32	30.3422	14.998	0.371943	4	5	12.1069	30.1608	18.2874	48.4481	12.4586	0.821728
2005	42.329	1866.01	0.793569	17.8635	0.308732	4	6	5.459	31.657	19.0914	50.7484	12.5823	0.823727
2006	42.123	1967	5.41225	8.23953	0.329671	4	7	8.26586	43.1113	21.498	64.6093	12.3386	0.88994
2007	41.9	2046.56	4.04467	5.38222	0.299674	4	8	9.24964	33.7285	30.7344	64.4629	17.8149	0.899302
2008	41.663	2117.84	3.4832	11.578	0.286428	4	9	8.32348	39.8831	25.0898	64.973	28.5697
2009	41.408	2205	4.11549	11.5377	0.306835	4	10	12.0882	30.7686	31.0342	61.8029	36.8933
2010	41.129	2314.96	4.98683	13.7202	0.506764	4	11	16.5552	25.2641	17.3873	42.6514	18.5984
2011	40.811	2363.67	2.10403	10.8408	0.496142	4	12	15.5339	31.3298	21.4643	52.7941	16.926
2012	40.45	2399.33	1.50883	12.217	0.49927	4	13	14.1625	31.4387	12.9414	44.3801	20.4274
2013	40.045	2461.8	2.60361	8.47583	0.488774	4	14	14.1687	18.0499	12.999	31.0489	19.667
2014	39.6	2548.43	3.51865	8.05738	0.488774	4	15	15.0812	18.4351	12.4501	30.8852	19.2374
2015	39.13	2548.17	-0.00992406	9.01768	0.495945	7	0	14.8272				19.8355

## Sheet: ARDLResult
Dependent Variable: GDPCG
Method: ARDL
Date: 02/01/17 Time: 09:52
Sample (adjusted): 1962 2014
Included observations: 53 after adjustments
Maximum dependent lags: 1 (Automatic selection)
Model selection method: Akaike info criterion (AIC)
Dynamic regressors (1 lag, automatic): GDPPC GFCF_IMF LABOR TO
POLFRE POLSTA
Fixed regressors: C
Number of models evalulated: 64
Selected Model: ARDL(1, 1, 0, 0, 0, 0, 0)
Variable	Coefficient	Std. Error	t-Statistic	Prob.*
GDPCG(-1)	0.05742	0.02811	2.04267	0.0471
GDPPC	0.067089	0.00178	37.6879	0
GDPPC(-1)	-0.069629	0.001882	-36.9905	0
GFCF_IMF	0.123814	0.051335	2.41191	0.0201
LABOR	2.28608	3.888	0.587984	0.5595
TO	0.004178	0.012825	0.325761	0.7461
POLFRE	-0.009599	0.011438	-0.839224	0.4059
POLSTA	-0.054282	0.06059	-0.895902	0.3752
C	1.70856	1.34142	1.27369	0.2095
R-squared	0.975655	Mean dependent var		1.64007
Adjusted R-squared	0.971228	S.D. dependent var		8.28474
S.E. of regression	1.40527	Akaike info criterion		3.67186
Sum squared resid	86.891	Schwarz criterion		4.00644
Log likelihood	-88.3043	Hannan-Quinn criter.		3.80052
F-statistic	220.417	Durbin-Watson stat		2.11802
Prob(F-statistic)	0
*Note: p-values and any subsequent tests do not account for model
selection.

## Sheet: ARDL Econ
Dependent Variable: GDPCG
Method: ARDL
Date: 02/01/17 Time: 11:36
Sample (adjusted): 1962 2014
Included observations: 53 after adjustments
Maximum dependent lags: 1 (Automatic selection)
Model selection method: Akaike info criterion (AIC)
Dynamic regressors (1 lag, automatic): GDPPC GFCF_IMF TO LABOR
Fixed regressors: C
Number of models evalulated: 16
Selected Model: ARDL(1, 1, 0, 0, 0)
Variable	Coefficient	Std. Error	t-Statistic	Prob.*
GDPCG(-1)	0.059578	0.027923	2.13366	0.0382
GDPPC	0.066527	0.001723	38.6003	0
GDPPC(-1)	-0.06941	0.001865	-37.2172	0
GFCF_IMF	0.130643	0.05088	2.56765	0.0136
TO	0.002644	0.012372	0.213723	0.8317
LABOR	1.31731	3.73107	0.353064	0.7257
C	2.2813	1.21655	1.87522	0.0671
R-squared	0.974692	Mean dependent var		1.64007
Adjusted R-squared	0.971391	S.D. dependent var		8.28474
S.E. of regression	1.40129	Akaike info criterion		3.63517
Sum squared resid	90.3267	Schwarz criterion		3.8954
Log likelihood	-89.332	Hannan-Quinn criter.		3.73524
F-statistic	295.27	Durbin-Watson stat		2.13345
Prob(F-statistic)	0
*Note: p-values and any subsequent tests do not account for model
selection.

## Sheet: ARDLPOLECO FREE
Dependent Variable: GDPCG
Method: ARDL
Date: 02/01/17 Time: 11:38
Sample (adjusted): 1962 2014
Included observations: 53 after adjustments
Maximum dependent lags: 1 (Automatic selection)
Model selection method: Akaike info criterion (AIC)
Dynamic regressors (1 lag, automatic): GDPPC GFCF_IMF TO LABOR
POLFRE
Fixed regressors: C
Number of models evalulated: 32
Selected Model: ARDL(1, 1, 0, 0, 0, 0)
Variable	Coefficient	Std. Error	t-Statistic	Prob.*
GDPCG(-1)	0.057207	0.028047	2.03964	0.0473
GDPPC	0.066823	0.001751	38.1562	0
GDPPC(-1)	-0.069615	0.001878	-37.0658	0
GFCF_IMF	0.125508	0.051187	2.45194	0.0182
TO	0.001478	0.012438	0.1188	0.906
LABOR	1.33969	3.73353	0.358825	0.7214
POLFRE	-0.010973	0.01131	-0.970193	0.3371
C	2.20288	1.22001	1.80563	0.0777
R-squared	0.975211	Mean dependent var		1.64007
Adjusted R-squared	0.971355	S.D. dependent var		8.28474
S.E. of regression	1.40219	Akaike info criterion		3.6522
Sum squared resid	88.476	Schwarz criterion		3.94961
Log likelihood	-88.7834	Hannan-Quinn criter.		3.76657
F-statistic	252.9	Durbin-Watson stat		2.07056
Prob(F-statistic)	0
*Note: p-values and any subsequent tests do not account for model
selection.

## Sheet: Error Correction Test
ARDL Cointegrating And Long Run Form
Original dep. variable: GDPCG
Selected Model: ARDL(1, 1, 0, 0, 0, 0, 0)
Date: 02/01/17 Time: 12:02
Sample: 1960 2015
Included observations: 53
Cointegrating Form
Variable	Coefficient	Std. Error	t-Statistic	Prob.
D(GDPPC)	0.066926	0.001806	37.0658	0
GFCF_IMF	0.011093	0.028247	0.392731	0.6964
TO	0.000584	0.011311	0.051612	0.9591
LABOR	-0.976265	2.27928	-0.428322	0.6705
POLFRE	-0.013511	0.011783	-1.14666	0.2577
POLSTA	0.015706	0.055466	0.283162	0.7784
CointEq(-1)	-0.933404	0.024541	-38.034	0
Cointeq = GDPCG - (-0.0027*GDPPC + 0.1314*GFCF_IMF + 0.0044*TO +
2.4253*LABOR -0.0102*POLFRE -0.0576*POLSTA + 1.8126 )
Long Run Coefficients
Variable	Coefficient	Std. Error	t-Statistic	Prob.
GDPPC	-0.002695	0.000993	-2.71419	0.0095
GFCF_IMF	0.131357	0.056101	2.34142	0.0238
TO	0.004432	0.013612	0.325624	0.7463
LABOR	2.42535	4.14928	0.584522	0.5619
POLFRE	-0.010184	0.012112	-0.840803	0.405
POLSTA	-0.057589	0.064318	-0.89538	0.3755
C	1.81264	1.42159	1.27508	0.209

## Sheet: BoundTest
ARDL Bounds Test
Date: 02/01/17 Time: 10:09
Sample: 1962 2014
Included observations: 53
Null Hypothesis: No long-run relationships exist
Test Statistic	Value	k
F-statistic	194.933	6
Critical Value Bounds
Significance	I0 Bound	I1 Bound
0.1	1.99	2.94
0.05	2.27	3.28
0.025	2.55	3.61
0.01	2.88	3.99
Test Equation:
Dependent Variable: D(GDPCG)
Method: Least Squares
Date: 02/01/17 Time: 10:09
Sample: 1962 2014
Included observations: 53
Variable	Coefficient	Std. Error	t-Statistic	Prob.
D(GDPPC)	0.066456	0.001764	37.672	0
C	1.67498	1.37278	1.22014	0.2289
GDPPC(-1)	-0.002417	0.000813	-2.97408	0.0048
GFCF_IMF(-1)	0.115197	0.047464	2.42702	0.0194
LABOR(-1)	0.739324	3.84578	0.192243	0.8484
TO(-1)	0.013817	0.013318	1.03741	0.3052
POLFRE(-1)	0.01086	0.011622	0.93443	0.3552
POLSTA(-1)	-0.03637	0.062625	-0.580764	0.5644
GDPCG(-1)	-0.942785	0.028099	-33.5526	0
R-squared	0.981531	Mean dependent var		0.100975
Adjusted R-squared	0.978173	S.D. dependent var		9.76567
S.E. of regression	1.44276	Akaike info criterion		3.72452
Sum squared resid	91.589	Schwarz criterion		4.0591
Log likelihood	-89.6998	Hannan-Quinn criter.		3.85318
F-statistic	292.301	Durbin-Watson stat		2.34334
Prob(F-statistic)	0

## Sheet: Lag Length Criteria
VAR Lag Order Selection Criteria
Endogenous variables: GDPCG GDPPC GFCF_IMF LABOR TO POLFRE POLSTA
Exogenous variables: C
Date: 02/01/17 Time: 09:50
Sample: 1960 2015
Included observations: 50
Lag	LogL	LR	FPE	AIC	SC	HQ
0	-1178.65	NA	932000000000	47.4258	47.6935	47.5278
1	-852.167	548.4856*	14374130	36.3267	38.46813*	37.14215*
2	-812.938	54.9201	23810937	36.7175	40.7328	38.2465
3	-754.361	65.6069	22309210	36.3344	42.2234	38.577
4	-676.277	65.5905	14081856*	35.17106*	42.9339	38.1272
* indicates lag order selected by the criterion
LR: sequential modified LR test statistic (each test at 5% level)
FPE: Final prediction error
AIC: Akaike information criterion
SC: Schwarz information criterion
HQ: Hannan-Quinn information criterion

## Sheet: Sheet 4
Item	1981	1982	1983	1984	1985	1986	1987	1988	1989	1990	1991	1992	1993	1994	1995	1996	1997	1998	1999	2000	2001	2002	2003	2004	2005	2006	2007	2008	2009	2010	2011 4	2012 4	2013 4	2014 4	2015 5
Total Expenditure	11.4137	11.9232	9.6365	9.9276	13.0411	16.2237	22.0187	27.7495	41.0283	60.2682	66.5844	92.7974	191.229	160.893	248.768	337.218	428.215	487.113	947.69	701.059	1018.03	1018.16	1225.97	1426.2	1822.1	1938	2450.9	3240.82	3452.99	4194.58	4712.06	4605.39	5185.32	4587.39	4988.86
Recurrent Expenditure1	4.8467	5.506	4.7508	5.8275	7.5764	7.6969	15.6462	19.4094	25.9942	36.2196	38.2435	53.0341	136.727	89.9749	127.63	124.491	158.564	178.098	449.662	461.6	579.3	696.8	984.3	1032.7	1223.7	1290.2	1589.27	2117.36	2127.97	3109.38	3314.51	3325.16	3689.06	3426.9	3831.95
Capital Expenditure2	6.567	6.4172	4.8857	4.1001	5.4647	8.5268	6.3725	8.3401	15.0341	24.0486	28.3409	39.7633	54.5018	70.9183	121.138	212.926	269.652	309.016	498.028	239.451	438.697	321.378	241.688	351.3	519.5	552.386	759.323	960.89	1152.8	883.875	918.549	874.834	1108.39	783.122	818.365
						Country Name	Country Code	Indicator Name	Indicator Code	1960	1961	1962	1963	1964	1965	1966	1967	1968	1969	1970	1971	1972	1973	1974	1975	1976	1977	1978	1979	1980	1981	1982	1983	1984	1985	1986	1987	1988	1989	1990	1991	1992	1993	1994	1995	1996	1997	1998	1999
Item	Total Expenditure	Recurrent Expenditure1	Capital Expenditure2			Nigeria	NGA	Export value index (2000 = 100)	TX.VAL.MRCH.XD.WD																					122.48	84.2401	57.5045	48.9421	55.9601	61.9203	24.0059	35.7042	32.4691	37.1729	64.565	57.9201	56.1349	54.7369	53.4571	58.8415	77.0136	72.502	46.984	66.0577
1981	11.4137	4.8467	6.567			Nigeria	NGA	Export volume index (2000 = 100)	TX.QTY.MRCH.XD.WD																					140.782	87.7501	79.8673	108.76	164.589	187.637	92.3302	67.3663	83.254	70.1376	83.8507	94.951	70.1686	91.2282	97.1947	96.4075	104.432	113.107	124.615	105.878
1982	11.9232	5.506	6.4172			Nigeria	NGA	Exports as a capacity to import (constant LCU)	NY.EXP.CAPM.KN																						4.90786e+12	3.82324e+12	3.21363e+12	3.79515e+12	4.20563e+12	1.84422e+12	1.65892e+12	1.55148e+12	3.09942e+12	2.7631e+12	3.24779e+12	2.44737e+12	2.58392e+12	1.96378e+12	1.90869e+12	2.41502e+12	3.06081e+12	1.95544e+12	2.45487e+12
1983	9.6365	4.7508	4.8857			Nigeria	NGA	Exports of goods and services (% of GDP)	NE.EXP.GNFS.ZS	9.24153	9.18513	8.26914	8.77917	9.20213	10.8934	10.4138	11.0773	9.92732	11.3911	8.40707	10.8343	10.9681	15.9179	25.1785	18.3388	18.2158	24.8724	19.5526	24.8161	29.3752	22.1875	17.8338	14.5362	15.7054	17.3852	13.316	26.9419	22.8546	43.9813	35.3442	41.7011	37.5094	33.8299	24.3102	35.7615	32.2386	41.7746	29.6915	33.8695
1984	9.9276	5.8275	4.1001			Nigeria	NGA	Exports of goods and services (annual % growth)	NE.EXP.GNFS.KD.ZG																							-10.4549	-7.67113	10.2743	8.46499	-8.91026	5.41229	3.01068	29.8291	-4.44508	8.06291	-26.5185	18.6482	2.26143	-8.57627	-10.878	47.904	2.08662	-10.7527
1985	13.0411	7.5764	5.4647			Nigeria	NGA	Exports of goods and services (BoP, current US$)	BX.GSR.GNFS.CD																		1.29362e+10	1.1318e+10	1.77597e+10	2.70712e+10	1.8771e+10	1.2657e+10	1.07577e+10	1.22892e+10	1.34296e+10	5.33478e+09	7.78404e+09	7.23876e+09	8.42325e+09	1.45504e+10	1.31402e+10	1.28438e+10	1.10726e+10	9.82997e+09	1.2342e+10	1.68496e+10	1.59937e+10	9.85487e+09	1.38559e+10
1986	16.2237	7.6969	8.5268			Nigeria	NGA	Exports of goods and services (constant 2010 US$)	NE.EXP.GNFS.KD																						2.84674e+10	2.54911e+10	2.35357e+10	2.59538e+10	2.81508e+10	2.56425e+10	2.70303e+10	2.78441e+10	3.61498e+10	3.45429e+10	3.73281e+10	2.74292e+10	3.25443e+10	3.32802e+10	3.0426e+10	2.71163e+10	4.0106e+10	4.09429e+10	3.65404e+10
1987	22.0187	15.6462	6.3725			Nigeria	NGA	Exports of goods and services (constant LCU)	NE.EXP.GNFS.KN																						4278592936400	3831268852600	3537367419100	3.90081e+12	4.23101e+12	3.85401e+12	4.06261e+12	4184917110800	5433240666200	5191728765400	5610333220100	4122555426700	4891337659800	5001951639000	4572970700100	4.07552e+12	6027857715000	6153636000600	5491954485800
1988	27.7495	19.4094	8.3401			Nigeria	NGA	Exports of goods and services (current LCU)	NE.EXP.GNFS.CN	2.76993e+08	293090200	2.89975e+08	323925700	3.64991e+08	457100000	473600000	411700000	368800000	539800000	753400000	1.1241e+09	1210300000	1950200000	4936000000	4.2079e+09	5.2118e+09	8.3534e+09	7049300000	10649100000	14766900200	11478000000	9.56945e+09	8425640000	10102730000	12785430000	9974800000	30151420000	33811390000	100475960000	99511830000	137226060000	208344150000	241965340000	229867070000	7.18292e+11	902369160000	1214230820000	836233750000	1121840500000
1989	41.0283	25.9942	15.0341			Nigeria	NGA	Exports of goods and services (current US$)	NE.EXP.GNFS.CD	3.87791e+08	4.10326e+08	4.05965e+08	4.53496e+08	5.10988e+08	6.39927e+08	6.63027e+08	5.76368e+08	5.1631e+08	7.55705e+08	1.05474e+09	9.94779e+08	1.34627e+09	2.41361e+09	6.25602e+09	5.09431e+09	6.61396e+09	8.96288e+09	7.14215e+09	1.17281e+10	1.88594e+10	1.35514e+10	9.16614e+09	5.1533e+09	4.47618e+09	5.0198e+09	2.75928e+09	6.49116e+09	5.31877e+09	1.06572e+10	1.08709e+10	1.14231e+10	1.09906e+10	5.3414e+09	4.39685e+09	1.02088e+10	11279614500	1.49646e+10	9502656250	1.21493e+10
1990	60.2682	36.2196	24.0486			Nigeria	NGA	Exports of goods, services and primary income (BoP, current US$)	BX.GSR.TOTL.CD																		1.32868e+10	1.16076e+10	1.8023e+10	2.77588e+10	1.9472e+10	1.28827e+10	1.08654e+10	1.23466e+10	1.35101e+10	5.39121e+09	7.82986e+09	7.27953e+09	8.57533e+09	1.47615e+10	1.33511e+10	1.29997e+10	1.11304e+10	9.87857e+09	1.24427e+10	1.69646e+10	1.62522e+10	1.01878e+10	1.40956e+10
1991	66.5844	38.2435	28.3409			Nigeria	NGA	Import value index (2000 = 100)	TM.VAL.MRCH.XD.WD																					190.838	241.36	183.454	141.119	107.706	101.938	49.0081	51.1983	63.4446	48.0105	64.5224	103.039	94.8859	63.4904	75.8285	94.2692	73.8239	108.944	105.62	98.4693
1992	92.7974	53.0341	39.7633			Nigeria	NGA	Import volume index (2000 = 100)	TM.QTY.MRCH.XD.WD																					397.58	482.72	416.94	486.618	489.571	443.208	132.454	70.1346	99.1321	68.5865	74.1637	125.657	77.143	62.8618	77.376	87.2946	87.8831	102.777	107.774	99.4696
1993	191.229	136.727	54.5018			Nigeria	NGA	Imports of goods and services (% of GDP)	NE.IMP.GNFS.ZS	16.925	16.2999	13.5604	13.5373	15.4132	16.0173	14.6225	17.4111	15.7362	15.4301	11.2135	13.6294	11.7955	15.3498	14.5685	22.8316	23.9223	22.5229	23.7622	19.0623	19.1961	26.1058	19.9147	12.501	7.90345	8.51486	10.4007	14.7048	12.4574	16.4104	17.686	23.1755	23.5216	24.28	17.9986	24.0063	25.4524	35.0854	36.4817	21.9769
1994	160.893	89.9749	70.9183			Nigeria	NGA	Imports of goods and services (annual % growth)	NE.IMP.GNFS.KD.ZG																							-26.0669	-35.2662	-30.8957	7.85307	-30.0683	-37.143	-6.60132	36.7526	19.5568	30.5457	-14.9728	20.837	-21.6	-11.8741	48.8085	34.8269	-6.53771	-33.7026
1995	248.768	127.63	121.138			Nigeria	NGA	Imports of goods and services (BoP, current US$)	BM.GSR.GNFS.CD																		1.32325e+10	1.45749e+10	1.52531e+10	2.00135e+10	2.40097e+10	1.83203e+10	1.38195e+10	1.06545e+10	9.10297e+09	4.24389e+09	4.95339e+09	5.15895e+09	5.06794e+09	6.90876e+09	1.02615e+10	8.99051e+09	9.38758e+09	9.51814e+09	1.28408e+10	1.12653e+10	1.42132e+10	1.33772e+10	1.20639e+10
1996	337.218	124.491	212.926			Nigeria	NGA	Imports of goods and services (constant 2010 US$)	NE.IMP.GNFS.KD																						3.84209e+10	2.84058e+10	1.83882e+10	1.2707e+10	1.37049e+10	9.58406e+09	6.02425e+09	5.62657e+09	7.69448e+09	9.19928e+09	1.20093e+10	1.02111e+10	1.23388e+10	9.67364e+09	8.52498e+09	1.26859e+10	1.7104e+10	1.59858e+10	1.05982e+10
1997	428.215	158.564	269.652			Nigeria	NGA	Imports of goods and services (constant LCU)	NE.IMP.GNFS.KN																						5774586936300	4269332472100	2763702604000	1909836165100	2059816915100	1.44046e+12	905432812200	845662255900	1156465205900	1382632652800	1804968008900	1534713387000	1854501870700	1.45393e+12	1281288072000	1906665502600	2570697860200	2402633032900	1592883757000
1998	487.113	178.098	309.016			Nigeria	NGA	Imports of goods and services (current LCU)	NE.IMP.GNFS.CN	5.07287e+08	520116400	475523200	499486800	611346000	6.721e+08	665000000	647100000	584600000	731200000	1004900000	1414100000	1.3016e+09	1880600000	2856000000	5.2388e+09	6844500000	7564300000	8567000000	8180000000	9649899500	13505000000	10686000000	7246000000	5084000000	6262000000	7791000000	1.64566e+10	18429550000	37489900000	49794900000	76263850000	1.3065e+11	173660630000	170187420000	4.82183e+11	7.12423e+11	1019800800000	1027473500000	727926500000
1999	947.69	449.662	498.028			Nigeria	NGA	Imports of goods and services (current US$)	NE.IMP.GNFS.CD	7.10202e+08	7.28163e+08	6.65732e+08	6.99281e+08	8.55884e+08	9.40921e+08	9.30981e+08	9.05922e+08	8.18424e+08	1.02366e+09	1.40683e+09	1.25142e+09	1.44783e+09	2.32748e+09	3.61977e+09	6.34237e+09	8.68591e+09	8.1162e+09	8.67984e+09	9.00881e+09	1.23243e+10	1.59445e+10	1.02356e+10	4.4318e+09	2.25255e+09	2.45858e+09	2.15519e+09	3.54286e+09	2.8991e+09	3.97644e+09	5.43969e+09	6.34844e+09	6.89204e+09	3.83357e+09	3.25531e+09	6.85308e+09	8.90528e+09	1.25684e+10	1.16758e+10	7.88327e+09
2000	701.059	461.6	239.451			Nigeria	NGA	Imports of goods, services and primary income (BoP, current US$)	BM.GSR.TOTL.CD																		1.41197e+10	1.50927e+10	1.5965e+10	2.20052e+10	2.53842e+10	1.97354e+10	1.48024e+10	1.18926e+10	1.0647e+10	5.04297e+09	7.87916e+09	7.56408e+09	7.61236e+09	9.85795e+09	1.28927e+10	1.14846e+10	1.27231e+10	1.25044e+10	1.58199e+10	1.44025e+10	1.76171e+10	1.60009e+10	1.48815e+10
2001	1018.03	579.3	438.697
2002	1018.16	696.8	321.378
2003	1225.97	984.3	241.688
2004	1426.2	1032.7	351.3
2005	1822.1	1223.7	519.5			Country Name	Nigeria	Nigeria	Nigeria	Nigeria	Nigeria	Nigeria	Nigeria	Nigeria	Nigeria	Nigeria	Nigeria	Nigeria	Nigeria	Nigeria	Nigeria	Nigeria	Nigeria	Nigeria	Nigeria	Nigeria	Nigeria
2006	1938	1290.2	552.386			Country Code	NGA	NGA	NGA	NGA	NGA	NGA	NGA	NGA	NGA	NGA	NGA	NGA	NGA	NGA	NGA	NGA	NGA	NGA	NGA	NGA	NGA
2007	2450.9	1589.27	759.323			Indicator Name	Export value index (2000 = 100)	Export volume index (2000 = 100)	Exports as a capacity to import (constant LCU)	Exports of goods and services (% of GDP)	Exports of goods and services (annual % growth)	Exports of goods and services (BoP, current US$)	Exports of goods and services (constant 2010 US$)	Exports of goods and services (constant LCU)	Exports of goods and services (current LCU)	Exports of goods and services (current US$)	Exports of goods, services and primary income (BoP, current US$)	Import value index (2000 = 100)	Import volume index (2000 = 100)	Imports of goods and services (% of GDP)	Imports of goods and services (annual % growth)	Imports of goods and services (BoP, current US$)	Imports of goods and services (constant 2010 US$)	Imports of goods and services (constant LCU)	Imports of goods and services (current LCU)	Imports of goods and services (current US$)	Imports of goods, services and primary income (BoP, current US$)
2008	3240.82	2117.36	960.89			Indicator Code	TX.VAL.MRCH.XD.WD	TX.QTY.MRCH.XD.WD	NY.EXP.CAPM.KN	NE.EXP.GNFS.ZS	NE.EXP.GNFS.KD.ZG	BX.GSR.GNFS.CD	NE.EXP.GNFS.KD	NE.EXP.GNFS.KN	NE.EXP.GNFS.CN	NE.EXP.GNFS.CD	BX.GSR.TOTL.CD	TM.VAL.MRCH.XD.WD	TM.QTY.MRCH.XD.WD	NE.IMP.GNFS.ZS	NE.IMP.GNFS.KD.ZG	BM.GSR.GNFS.CD	NE.IMP.GNFS.KD	NE.IMP.GNFS.KN	NE.IMP.GNFS.CN	NE.IMP.GNFS.CD	BM.GSR.TOTL.CD
2009	3452.99	2127.97	1152.8			1960				9.24153					2.76993e+08	3.87791e+08				16.925					5.07287e+08	7.10202e+08
2010	4194.58	3109.38	883.875			1961				9.18513					293090200	4.10326e+08				16.2999					520116400	7.28163e+08
2011 4	4712.06	3314.51	918.549			1962				8.26914					2.89975e+08	4.05965e+08				13.5604					475523200	6.65732e+08
2012 4	4605.39	3325.16	874.834			1963				8.77917					323925700	4.53496e+08				13.5373					499486800	6.99281e+08
2013 4	5185.32	3689.06	1108.39			1964				9.20213					3.64991e+08	5.10988e+08				15.4132					611346000	8.55884e+08
2014 4	4587.39	3426.9	783.122			1965				10.8934					457100000	6.39927e+08				16.0173					6.721e+08	9.40921e+08
2015 5	4988.86	3831.95	818.365			1966				10.4138					473600000	6.63027e+08				14.6225					665000000	9.30981e+08
						1967				11.0773					411700000	5.76368e+08				17.4111					647100000	9.05922e+08
						1968				9.92732					368800000	5.1631e+08				15.7362					584600000	8.18424e+08
						1969				11.3911					539800000	7.55705e+08				15.4301					731200000	1.02366e+09
						1970				8.40707					753400000	1.05474e+09				11.2135					1004900000	1.40683e+09
						1971				10.8343					1.1241e+09	9.94779e+08				13.6294					1414100000	1.25142e+09
						1972				10.9681					1210300000	1.34627e+09				11.7955					1.3016e+09	1.44783e+09
						1973				15.9179					1950200000	2.41361e+09				15.3498					1880600000	2.32748e+09
						1974				25.1785					4936000000	6.25602e+09				14.5685					2856000000	3.61977e+09
						1975				18.3388					4.2079e+09	5.09431e+09				22.8316					5.2388e+09	6.34237e+09
						1976				18.2158					5.2118e+09	6.61396e+09				23.9223					6844500000	8.68591e+09
						1977				24.8724		1.29362e+10			8.3534e+09	8.96288e+09	1.32868e+10			22.5229		1.32325e+10			7564300000	8.1162e+09	1.41197e+10
						1978				19.5526		1.1318e+10			7049300000	7.14215e+09	1.16076e+10			23.7622		1.45749e+10			8567000000	8.67984e+09	1.50927e+10
						1979				24.8161		1.77597e+10			10649100000	1.17281e+10	1.8023e+10			19.0623		1.52531e+10			8180000000	9.00881e+09	1.5965e+10
						1980	122.48	140.782		29.3752		2.70712e+10			14766900200	1.88594e+10	2.77588e+10	190.838	397.58	19.1961		2.00135e+10			9649899500	1.23243e+10	2.20052e+10
						1981	84.2401	87.7501	4.90786e+12	22.1875		1.8771e+10	2.84674e+10	4278592936400	11478000000	1.35514e+10	1.9472e+10	241.36	482.72	26.1058		2.40097e+10	3.84209e+10	5774586936300	13505000000	1.59445e+10	2.53842e+10
						1982	57.5045	79.8673	3.82324e+12	17.8338	-10.4549	1.2657e+10	2.54911e+10	3831268852600	9.56945e+09	9.16614e+09	1.28827e+10	183.454	416.94	19.9147	-26.0669	1.83203e+10	2.84058e+10	4269332472100	10686000000	1.02356e+10	1.97354e+10
						1983	48.9421	108.76	3.21363e+12	14.5362	-7.67113	1.07577e+10	2.35357e+10	3537367419100	8425640000	5.1533e+09	1.08654e+10	141.119	486.618	12.501	-35.2662	1.38195e+10	1.83882e+10	2763702604000	7246000000	4.4318e+09	1.48024e+10
						1984	55.9601	164.589	3.79515e+12	15.7054	10.2743	1.22892e+10	2.59538e+10	3.90081e+12	10102730000	4.47618e+09	1.23466e+10	107.706	489.571	7.90345	-30.8957	1.06545e+10	1.2707e+10	1909836165100	5084000000	2.25255e+09	1.18926e+10
						1985	61.9203	187.637	4.20563e+12	17.3852	8.46499	1.34296e+10	2.81508e+10	4.23101e+12	12785430000	5.0198e+09	1.35101e+10	101.938	443.208	8.51486	7.85307	9.10297e+09	1.37049e+10	2059816915100	6262000000	2.45858e+09	1.0647e+10
						1986	24.0059	92.3302	1.84422e+12	13.316	-8.91026	5.33478e+09	2.56425e+10	3.85401e+12	9974800000	2.75928e+09	5.39121e+09	49.0081	132.454	10.4007	-30.0683	4.24389e+09	9.58406e+09	1.44046e+12	7791000000	2.15519e+09	5.04297e+09
						1987	35.7042	67.3663	1.65892e+12	26.9419	5.41229	7.78404e+09	2.70303e+10	4.06261e+12	30151420000	6.49116e+09	7.82986e+09	51.1983	70.1346	14.7048	-37.143	4.95339e+09	6.02425e+09	905432812200	1.64566e+10	3.54286e+09	7.87916e+09
						1988	32.4691	83.254	1.55148e+12	22.8546	3.01068	7.23876e+09	2.78441e+10	4184917110800	33811390000	5.31877e+09	7.27953e+09	63.4446	99.1321	12.4574	-6.60132	5.15895e+09	5.62657e+09	845662255900	18429550000	2.8991e+09	7.56408e+09
						1989	37.1729	70.1376	3.09942e+12	43.9813	29.8291	8.42325e+09	3.61498e+10	5433240666200	100475960000	1.06572e+10	8.57533e+09	48.0105	68.5865	16.4104	36.7526	5.06794e+09	7.69448e+09	1156465205900	37489900000	3.97644e+09	7.61236e+09
						1990	64.565	83.8507	2.7631e+12	35.3442	-4.44508	1.45504e+10	3.45429e+10	5191728765400	99511830000	1.08709e+10	1.47615e+10	64.5224	74.1637	17.686	19.5568	6.90876e+09	9.19928e+09	1382632652800	49794900000	5.43969e+09	9.85795e+09
						1991	57.9201	94.951	3.24779e+12	41.7011	8.06291	1.31402e+10	3.73281e+10	5610333220100	137226060000	1.14231e+10	1.33511e+10	103.039	125.657	23.1755	30.5457	1.02615e+10	1.20093e+10	1804968008900	76263850000	6.34844e+09	1.28927e+10
						1992	56.1349	70.1686	2.44737e+12	37.5094	-26.5185	1.28438e+10	2.74292e+10	4122555426700	208344150000	1.09906e+10	1.29997e+10	94.8859	77.143	23.5216	-14.9728	8.99051e+09	1.02111e+10	1534713387000	1.3065e+11	6.89204e+09	1.14846e+10
						1993	54.7369	91.2282	2.58392e+12	33.8299	18.6482	1.10726e+10	3.25443e+10	4891337659800	241965340000	5.3414e+09	1.11304e+10	63.4904	62.8618	24.28	20.837	9.38758e+09	1.23388e+10	1854501870700	173660630000	3.83357e+09	1.27231e+10
						1994	53.4571	97.1947	1.96378e+12	24.3102	2.26143	9.82997e+09	3.32802e+10	5001951639000	229867070000	4.39685e+09	9.87857e+09	75.8285	77.376	17.9986	-21.6	9.51814e+09	9.67364e+09	1.45393e+12	170187420000	3.25531e+09	1.25044e+10
						1995	58.8415	96.4075	1.90869e+12	35.7615	-8.57627	1.2342e+10	3.0426e+10	4572970700100	7.18292e+11	1.02088e+10	1.24427e+10	94.2692	87.2946	24.0063	-11.8741	1.28408e+10	8.52498e+09	1281288072000	4.82183e+11	6.85308e+09	1.58199e+10
						1996	77.0136	104.432	2.41502e+12	32.2386	-10.878	1.68496e+10	2.71163e+10	4.07552e+12	902369160000	11279614500	1.69646e+10	73.8239	87.8831	25.4524	48.8085	1.12653e+10	1.26859e+10	1906665502600	7.12423e+11	8.90528e+09	1.44025e+10
						1997	72.502	113.107	3.06081e+12	41.7746	47.904	1.59937e+10	4.0106e+10	6027857715000	1214230820000	1.49646e+10	1.62522e+10	108.944	102.777	35.0854	34.8269	1.42132e+10	1.7104e+10	2570697860200	1019800800000	1.25684e+10	1.76171e+10
						1998	46.984	124.615	1.95544e+12	29.6915	2.08662	9.85487e+09	4.09429e+10	6153636000600	836233750000	9502656250	1.01878e+10	105.62	107.774	36.4817	-6.53771	1.33772e+10	1.59858e+10	2402633032900	1027473500000	1.16758e+10	1.60009e+10
						1999	66.0577	105.878	2.45487e+12	33.8695	-10.7527	1.38559e+10	3.65404e+10	5491954485800	1121840500000	1.21493e+10	1.40956e+10	98.4693	99.4696	21.9769	-33.7026	1.20639e+10	1.05982e+10	1592883757000	727926500000	7.88327e+09	1.48815e+10
						2000	100	100	4.72069e+12	51.7304	13.253	2.09649e+10	4.13831e+10	6219804152100	2440292910000	2.39956e+10	2.11825e+10	100	100	19.6502	12.5751	1.20172e+10	1.19309e+10	1793191103800	926963800000	9.11493e+09	1.53826e+10
						2001	86.031	97.2631	3.60569e+12	45.4481	-23.6196	1.96451e+10	3.16086e+10	4750714360300	2231285080000	2.00599e+10	1.98441e+10	132.847	136.309	36.3648	60.8893	1.57362e+10	1.91955e+10	2885051874500	1785338410000	1.60507e+10	1.87329e+10
						2002	85.6973	95.7677	4.02493e+12	35.9657	11.6274	1.81372e+10	3.52839e+10	5303098194800	2.56371e+12	2.12618e+10	1.83207e+10	86.5353	89.2608	27.4179	6.35336	1.57972e+10	2.04151e+10	3.06835e+12	1954406920000	1.62086e+10	1.86509e+10
						2003	114.57	110.054	5.28719e+12	39.7879	31.3612	2.74492e+10	4.63493e+10	6966213998600	3478515470000	2.69188e+10	2.75309e+10	124.442	121.729	35.431	53.4449	2.18669e+10	3.13259e+10	4.70823e+12	3097607390000	2.39711e+10	2.51915e+10
						2004	184.176	137.716	5.18602e+12	30.1608	-0.954719	3.81022e+10	4.59068e+10	6899706207600	3520846240000	2.64948e+10	3.82596e+10	162.407	144.125	18.2874	-33.2139	2.0982e+10	2.09214e+10	3144442277800	2134795830000	1.60646e+10	2.36712e+10
						2005	240.605	127.825	6.96697e+12	31.657	12.3745	5.6994e+10	5.15876e+10	7753513109300	4664757250000	3.55344e+10	5.71492e+10	237.969	197.107	19.0914	33.619	3.26266e+10	2.79549e+10	4201572645900	2813177900000	2.14298e+10	3.57726e+10
						2006	279.981	123.217	9.33713e+12	43.1113	60.2178	5.92336e+10	8.26525e+10	1.24225e+13	8066037710000	6.26967e+10	6.11088e+10	304.112	235.237	21.498	10.8173	3.59118e+10	3.09789e+10	4656070553900	4022226970000	3.12645e+10	4.23886e+10
						2007	317.549	127.18	9.47916e+12	33.7285	-17.6522	6.74824e+10	6.80625e+10	10229663416000	7.06306e+12	5.61415e+10	7.00462e+10	399.37	282.51	30.7344	85.5144	4.66363e+10	5.74704e+10	8.63768e+12	6436060750000	5.11578e+10	6.09477e+10
						2008	411.316	119.555	1.21847e+13	39.8831	28.7653	8.80357e+10	8.76409e+10	13172257792100	9837271240000	8.29827e+10	9.03876e+10	572.743	360.332	25.0898	-11.2587	6.42208e+10	5.1e+10	7665193098600	6.18847e+12	5.22031e+10	8.16317e+10
						2009	270.522	119.619	8.48714e+12	30.7686	-30.7018	5.83853e+10	6.07336e+10	9128131974600	7764785300000	5.21471e+10	5.93206e+10	388.776	265.236	31.0342	11.6789	4.94761e+10	5.69562e+10	8560405876200	7831817790000	5.25972e+10	6.48148e+10
						2010	400.477	142.292	1.40138e+13	25.2641	53.5236	8.2699e+10	9.32404e+10	1.40138e+13	1.40138e+13	9.32404e+10	8.36967e+10	507.21	331.945	17.3873	12.6653	7.08528e+10	6.41699e+10	9644605300000	9644605300000	6.41699e+10	9.12905e+10
						2011	553.039	145.986	1.29748e+13	31.3298	25.7927	1.02438e+11	1.1729e+11	17628391000000	19961271400000	1.28999e+11	1.03336e+11	642.106	373.752	21.4643	-7.83336	9.07942e+10	5.91432e+10	8889108300000	13675626400000	8.83779e+10	1.14474e+11
						2012	553.039	143.566	1.44917e+13	31.4387	-3.58897	9.85241e+10	1.1308e+11	16995713000000	2.28244e+13	1.44918e+11	9.94807e+10	584.775	342.891	12.9414	-32.8917	8.08745e+10	3.969e+10	5965333700000	9395400600000	5.96538e+10	1.03917e+11
						2013	495.828	132.675	9.29513e+12	18.0499	-21.7365	9.94193e+10	8.85004e+10	13301436870000	1.46222e+13	9.29509e+10	1.003e+11	642.106	384.464	12.999	12.2158	7.66541e+10	4.45385e+10	6694047330000	1.05304e+13	6.69402e+10	1.03056e+11
						2014	462.455	133.14	1.05779e+13	18.4351	15.6327	8.38931e+10	1.02335e+11	1.53808e+13	16616866750000	1.04803e+11	8.55129e+10	687.971	417.292	12.4501	6.71756	8.53549e+10	4.75304e+10	7143723820000	11222115570000	7.07785e+10	1.05985e+11
						2015
[truncated: 16 more columns]

## Sheet: Correlation
	TO	POLSTA	POLFRE	LABOR	GFCF_IMF	GDPPC	GDPCG
TO	1	0.264296	-0.0666725	0.222685	-0.33433	-0.0191218	0.0141293
POLSTA	0.264296	1	0.176604	0.552343	-0.0206208	0.55495	0.158347
POLFRE	-0.0666725	0.176604	1	0.11688	-0.0749855	0.125074	0.145091
LABOR	0.222685	0.552343	0.11688	1	-0.233822	0.455658	0.119919
GFCF_IMF	-0.33433	-0.0206208	-0.0749855	-0.233822	1	0.385967	-0.21078
GDPPC	-0.0191218	0.55495	0.125074	0.455658	0.385967	1	0.239688
GDPCG	0.0141293	0.158347	0.145091	0.119919	-0.21078	0.239688	1

[truncated: 3 more sheets: VECM, data, definition]
